# Supplementary material
Source: PubMed Central journal article supplement (PMC4721091)
Supplement: rspb20152320supp1.pdf [file rspb20152320supp1.pdf]

30 the *C. caretta* [1,4]. Nest temperatures are on average 2-3 °C cooler at DHI relative to BB  
31 during the respective peaks of summer nesting, and are subject to greater diel fluctuations of  
32 temperatures throughout the nesting season [5,6]. Embryos developing on these beaches can  
33 experience temperatures above 35°C near the end of incubation and lethal heating event [6],  
34 and incubation temperatures are likely to further increase as air temperatures rise with climate  
35 change [7].

36

37 We collected 1200 *C. caretta* eggs from Turtle Bay on DHI (80 eggs from each of 15  
38 clutches) during peak nesting in late January 2013. This large collection was made to  
39 maximise the number of potential sires in each clutch sample, but when highly skewed  
40 paternity was detected [8] we opted to collect smaller samples from other sites.  
41 Consequently, 20 eggs were collected from each of four clutches deposited at Bungelup  
42 Beach near the end of peak nesting in early January 2014 (80 eggs in total). Although we had  
43 approval to sample up to 15 clutches from this site (300 eggs), this was not possible due to  
44 low densities of nesting females during our fieldwork. In all cases, eggs were collected while  
45 the females were nesting and were transported to the University of Western Australia  
46 following published protocols [9].

47

## 48 **(2) Incubation and heat shock treatments**

49 We distributed eggs among 1.5 L plastic containers half-filled with moist white sand; each  
50 contained a randomly selected egg from each female to limit clutch effects (DHI: 80  
51 containers each with 15 eggs, BB: 20 containers each with 4 eggs). All eggs were held in one  
52 of two 500 L incubators (Steridium, Brisbane, QLD, Australia) at 29 °C ( $\pm 0.3$  °C), which is  
53 the pivotal temperature that produces a balanced sex ratio for this population [6] and provides  
54 near optimum incubation conditions. Following a previously established protocol for

55 inducing upregulation of heat shock genes in *C. caretta*, embryos were incubated for 45 days  
56 at 29 °C, and then either transferred to an incubator at 36 °C for 3 hrs (heat shock treatment),  
57 or else moved to an incubator at 29 °C for 3 hrs (procedural control) [9]. The heat shock  
58 temperature is one that causes 100% mortality in *C. caretta* at constant temperature  
59 incubation [10], but is non-lethal to 45 day old embryos if exposure is limited to three hours  
60 [9]. After a one-hour cool down period [9], embryos were removed from the egg, weighed,  
61 and given a lethal injection of MS-222 (50 mg/kg, Sigma) [9,11] followed by decapitation to  
62 ensure death.

63

### 64 **(3) RNA extraction and RT-qPCR**

65 We selected cardiac tissue for gene expression analysis, as it increases expression of *hsps* in  
66 response to heat stress [9,12–14]. Whole heart was isolated and cut in half through the aorta,  
67 atria, and ventricle. Each half was immediately stored in *RNAlater* (AM7021, Invitrogen) at  
68 –80 °C until RNA extraction. Paternity data from a concurrent study [8] was used as criterion  
69 for selecting embryos from each family (mother-father pair) for gene expression assays. For  
70 each family, expression assays were performed on 3-5 offspring in each of the procedural  
71 control and heat shock treatments. Total RNA was extracted from each half of cardiac tissue,  
72 and purity and quantity of RNA were measured following previously published protocols [9]  
73 briefly described in-text.

74

#### 75 **(4) Detailed statistical analyses**

76 Cycle Threshold (Cq) values (the number of PCR cycles required for the fluorescence signal  
77 to cross a threshold line) obtained from real-time PCR were converted to relative gene  
78 expression values  $\Delta Cq$  and  $\Delta\Delta Cq$  using the methods described in similar studies [9,15]. A  
79 mean  $\Delta Cq$  value, which is the difference between the mean Cq value of the target gene  
80 (*hsp60*, *hsp70* and *hsp90*) and the mean of the reference gene (*18s*), were calculated for each  
81 embryo in the procedural control and heat shock treatments. The mean  $\Delta Cq$  values for the  
82 procedural control samples represent baseline expression levels, whereas the mean  $\Delta Cq$   
83 values for the heat shock treatment samples represent expression levels under thermal stress.  
84 The  $\Delta\Delta Cq$  values, which measure the change in relative gene expression between treatments,  
85 were calculated by subtracting the mean  $\Delta Cq$  value for the control samples for each clutch  
86 from the mean  $\Delta Cq$  value for each embryo in the heat shock treatment. These values  
87 represent the level of plasticity (up- or down-regulation) in gene expression in response to the  
88 heat shock treatment.

89

90 In the dataset made available on DRYAD, the reported Cq values are the average Cq  
91 for each reference and target gene for each individual offspring analysed from each clutch.  
92 The average Cq value for each offspring was calculated in this manner, as only one of the  
93 two independent RNA extractions was successful for some individuals. Data are organised by  
94 Sire ID, as more than one male sired three of the 18 clutches.

95

96 A linear mixed-effects model was used to estimate variance components between and  
97 within rookeries. The model included rookery and clutch nested within rookery as random  
98 factors. Comparing total variances explained by the full model with a model having one  
99 factor removed tested the significance of each level in the analysis. Variance components

100 were calculated using REML, and the *VarCorr* function in the R package nlme [16]. All  $\Delta Cq$   
101 and  $\Delta\Delta Cq$  values were log-transformed with  $2^{-X}$ , where X is the mean  $\Delta Cq$  or mean  $\Delta\Delta Cq$   
102 value, prior to analysis.

103

104 The heritabilities of  $\Delta Cq$  values for *hsp60*, *hsp70*, and *hsp90* were estimated using an  
105 ‘animal model’ in ASReml 3.0 [17,18]. The animal model is a linear mixed model used for  
106 quantitative genetic analyses, which in our study can be used to estimate additive genetic  
107 variance and maternal effects, even when some pedigree information is absent [19]. A  
108 pedigree for these analyses was generated using available paternity information for each  
109 offspring [8]. We fitted separate animal models to each treatment (control and heat shock),  
110 with rookery, offspring identity, and dam as random factors. The term ‘dam’ is the maternal  
111 identity and estimates the genetic and environmental variance that is common to different  
112 mothers in the data set. Rookery and offspring identity measure genetic variance between  
113 rookeries and individual offspring, respectively. When the only pedigree term in the best-  
114 fitting model was dam, we estimated broad-sense heritability [20]. However, when both dam  
115 and offspring were included in the model we were able to estimate narrow-sense heritability.  
116 Narrow-sense heritability is of primary interest because it measures the extent to which  
117 phenotypes are determined by genes inherited from both parents, and is hence directly related  
118 to the ability of a population to respond to selection [20].

119

120 We also estimated heritability of expression across treatments (phenotypic plasticity)  
121 using the mean  $\Delta\Delta Cq$  values for *hsp60*, *hsp70*, and *hsp90*. Again, we fit the animal models to  
122 our data using the same parameters. For both the within treatment ( $\Delta Cq$ ) and across treatment  
123 ( $\Delta\Delta Cq$ ) estimates REML Likelihood-ratio tests (REML LRT [18]) were used to find the best

124 fitting model, by starting with a fully saturated model and then systematically reducing the  
125 number of parameters.

126

127           We constructed a bivariate animal model to test for a genetic correlation between  
128 levels of gene expression in the two different treatments, but models failed to converge.  
129 Consequently, we used Spearman's rank correlation to analyse whether, at the clutch level,  
130 the rank order of mean expression was correlated between treatments for each gene, and if  
131 mean expression was correlated between genes for each treatment.

132 **References**

- 133 1. Baldwin, R., Hughes, G. R., Prince, R. I. T. 2003 Loggerhead turtles in the Indian  
134 Ocean. In *Loggerhead Sea Turtles* (eds B. E. Bolten, A. B., Witherington), pp. 218–  
135 234. Smithsonian Books Washington.
- 136 2. Pike, D. A. 2013 Climate influences the global distribution of sea turtle nesting. *Glob.*  
137 *Ecol. Biogeogr.* **22**, 555–566. (doi:10.1111/geb.12025)
- 138 3. Pacioni, C., Trocini, S., Heithaus, M., Burkholder, D., Thomson, J., Warren, K. &  
139 Krutzen, M. 2012 Preliminary assessment of the genetic profile of the Western  
140 Australian loggerhead turtle population using mitochondrial DNA. In *Proceedings of*  
141 *the First Western Australian Marine Turtle Symposium* (eds Prince, R.I.T., Whiting,  
142 S., Raudino, H., Vitenbergs, A., Pendoley, K.), pp. 19.
- 143 4. Reinhold, L. & Whiting, A. 2014 High-density loggerhead sea turtle nesting on Dirk  
144 Hartog Island, Western Australia. *Mar. Turt. Newsl.* , 7–10.
- 145 5. Trocini, S. 2013 Health assessment and hatching success of two Western Australian  
146 loggerhead turtle (*Caretta caretta*) populations. PhD Thesis. Murdoch University,  
147 Perth.
- 148 6. Woolgar, L., Trocini, S. & Mitchell, N. 2013 Key parameters describing temperature-  
149 dependent sex determination in the southernmost population of loggerhead sea turtles.  
150 *J. Exp. Mar. Bio. Ecol.* **449**, 77–84. (doi:10.1016/j.jembe.2013.09.001)
- 151 7. Woolgar, L. A comparison of two techniques used to model sand temperatures and sex  
152 ratios at loggerhead turtle (*Caretta caretta*) rookeries in Western Australia. [Master's  
153 Thesis]. Perth, Western Australia. University of Western Australia; 2012.
- 154 8. Tedeschi, J. N., Mitchell, N. J., Berry, O., Whiting, S., Meekan, M. & Kennington, W.  
155 J. 2014 Reconstructed paternal genotypes reveal variable rates of multiple paternity at  
156 three rookeries of loggerhead sea turtles (*Caretta caretta*) in Western Australia. *Aust.*  
157 *J. Zool.* (doi:10.1071/ZO14076)
- 158 9. Tedeschi, J. N., Kennington, W. J., Berry, O., Whiting, S., Meekan, M. & Mitchell, N.  
159 J. 2014 Increased expression of hsp70 and hsp90 mRNA as biomarkers of thermal  
160 stress in loggerhead turtle embryos (*Caretta caretta*). *J. Therm. Biol.* **47**, 42–50.  
161 (doi:10.1016/j.jtherbio.2014.11.006)
- 162 10. Howard, R., Bell, I. & Pike, D. A. 2014 Thermal tolerances of sea turtle embryos:  
163 current understanding and future directions. *Endanger. Species Res.* **26**, 75–86.  
164 (doi:10.3354/esr00636)
- 165 11. Conroy, C. J., Papenfuss, T., Parker, J. & Hahn, N. E. 2009 Use of tricaine  
166 methanesulfonate (MS-222) for euthanasia of reptiles. *J. Am. Assoc. Lab. Anim. Sci.*  
167 **48**, 28–32.

- 168 12. Stecyk, J. A. W., Couturier, C. S., Fagernes, C. E., Ellefsen, S. & Nilsson, G. E. 2012  
169 Quantification of heat shock protein mRNA expression in warm and cold anoxic  
170 turtles (*Trachemys scripta*) using an external RNA control for normalization. *Comp.*  
171 *Biochem. Physiol. - Part D Genomics Proteomics* **7**, 59–72.  
172 (doi:10.1016/j.cbd.2011.11.001)
- 173 13. Chang, J., Knowlton, A. A. & Wasser, J. S. 2000 Expression of heat shock proteins in  
174 turtle and mammal hearts: relationship to anoxia tolerance. *Am. J. Physiol. - Regul.*  
175 *Integr. Comp. Physiol.* **278**, 209–214.
- 176 14. Li, X., Kang, Y., Zhang, X., Zhu, B. & Fang, W. 2012 Identification of a heat shock  
177 cognate protein 70 gene in Chinese soft-shell turtle (*Pelodiscus sinensis*) and its  
178 expression profiles under thermal stress. *J. Zhejiang Univ. Sci. B* **13**, 465–77.  
179 (doi:10.1631/jzus.B1100309)
- 180 15. Livak, K. J. & Schmittgen, T. D. 2001 Analysis of relative gene expression data using  
181 real-time quantitative PCR and the  $2^{-\Delta\Delta Ct}$  method. *Methods* **25**, 402–8.  
182 (doi:10.1006/meth.2001.1262)
- 183 16. Pinheiro, J., Bates, D., DebRoy, S. & Sarkar, D. 2014 R Core Team (2014). nlme:  
184 linear and nonlinear mixed effects models. R package version 3.1-117.
- 185 17. Gilmour, A. R., Thompson, R. & Cullis, B. R. 1995 Average Information REML: An  
186 efficient algorithm for variance parameter estimation in linear mixed models.  
187 *Biometrics* **51**, 1440–1450. (doi:10.2307/2533274)
- 188 18. Gilmour, A. R., Gogel, B. J., Cullis, B. R. & Thompson, R. 2009 ASReml user guide  
189 release 3.0. *VSN Int. Ltd.*
- 190 19. Kruuk, L. E. B. 2004 Estimating genetic parameters in natural populations using the  
191 ‘animal model’. *Philos. Trans. R. Soc. Lond. B. Biol. Sci.* **359**, 873–90.  
192 (doi:10.1098/rstb.2003.1437)
- 193 20. Falconer, D. S. & Mackay, T. F. C. 1996 Heritability. In *Introduction to Quantitative*  
194 *Genetics*, pp. 160–183. 4<sup>th</sup> Ed. Essex: Pearson Education Limited.

195

196



197 **Supplementary table 1.**

198 Primers used for RT-qPCR. Efficiencies and coefficients of determination ( $R^2$ ) are given for

199 each primer pair.

| Gene                      | Accession Number | Primers for RT-qPCR                                | Efficiency | $R^2$ |
|---------------------------|------------------|----------------------------------------------------|------------|-------|
| <i>18s</i><br>(Reference) | KJ683738         | F: GCTAATACATGCCGACGAG<br>R: GGCCCGAGGTTATCTAGAG   | 110.77%    | 0.998 |
| <i>hsp60</i><br>(Target)  | KJ683735         | F: TACTGATGCACTGAACGCT<br>R: TGGCGTTAAAGCATCTAGTG  | 103.15%    | 0.999 |
| <i>hsp70</i><br>(Target)  | KJ683736         | F: TCTCCGTACAGCTTGTGAAC<br>R: CCACGGAACAGATCAGC    | 108.78%    | 0.998 |
| <i>hsp90</i><br>(Target)  | KJ683737         | F: GGATACTGGCATAGGGATG<br>R: CAACACCAAACCTGACCAATC | 106.28%    | 0.996 |

200
